# Supplementary material for: MSLP: mRNA subcellular localization predictor based on machine learning techniques
Source: Springer Nature journal article supplement (doi:10.1186/s12859-023-05232-0), 2023-03-22
Supplement: 12859_2023_5232_MOESM1_ESM.pdf [file 12859_2023_5232_MOESM1_ESM.pdf]

**Additional File S1: List of physicochemical properties related to DPCP and TPCP.**

**Physicochemical properties for DPCP**

|                                |                               |                               |                              |                               |
|--------------------------------|-------------------------------|-------------------------------|------------------------------|-------------------------------|
| Base stacking                  | Protein induced deformability | B-DNA twist                   | Propeller twist              | Duplex stability:(freeenergy) |
| Duplex tability(disruptenergy) | Protein DNA twist             | Stabilising energy of Z-DNA   | Aida_BA_transition           | Breslauer_dS                  |
| Electron_interaction           | Hartman_trans_free_energy     | Lisser_BZ_transition          | Polar_interaction            | SantaLucia_dG                 |
| Sarai_flexibility              | Stability                     | Stacking_energy               | Sugimoto_dS                  | Watson-Crick_interaction      |
| Twist                          | Shift                         | Slide                         | Rise                         | Twist stiffness               |
| Tilt stiffness                 | Shift_rise                    | Twist_shift                   | Enthalpy1                    | Twist_twist                   |
| Shift2                         | Tilt3                         | Tilt1                         | Slide (DNA-protein complex)1 | Tilt_shift                    |
| Twist_tilt                     | Roll_rise                     | Stacking energy               | Stacking energy1             | Propeller Twist               |
| Roll11                         | Rise (DNA-protein complex)    | Roll2                         | Roll3                        | Roll1                         |
| Slide_slide                    | Enthalpy                      | Shift_shift                   | Flexibility_slide            | Minor Groove Distance         |
| Rise (DNA-protein complex)1    | Roll (DNA-protein complex)1   | Entropy                       | Cytosine content             | Major Groove Distance         |
| Twist (DNA-protein complex)    | Purine (AG) content           | Tilt_slide                    | Major Groove Width           | Major Groove Depth            |
| Free energy6                   | Free energy7                  | Free energy4                  | Free energy3                 | Free energy1                  |
| Twist_roll                     | Flexibility_shift             | Shift (DNA-protein complex) 1 | Thymine content              | Tip                           |
| Keto (GT) content              | Roll stiffness                | Entropy1                      | Roll_slide                   | Slide (DNA-protein complex)   |
| Twist2                         | Twist5                        | Twist4                        | Tilt (DNA-protein complex)1  | Twist_slide                   |
| Minor Groove Depth             | Persistence Length            | Rise3                         | Shift stiffness              | Slide3                        |
| Slide2                         | Slide1                        | Rise1                         | Rise stiffness               | Mobility to bend towards      |
| Dinucleotide GC Content        | A-philarity                   | Wedge                         | DNA denaturation             | Bending stiffness             |
| Free energy5                   | Breslauer_dG                  | Breslauer_dH                  | Shift (DNA-                  | Helix-Coil_transition         |
| Ivanov_BA_transition           | Slide_rise                    | SantaLucia_dH                 | SantaLucia_dS                | Minor Groove Width            |

|                 |                          |                   |                    |                     |
|-----------------|--------------------------|-------------------|--------------------|---------------------|
| Sugimoto_dG     | Sugimoto_dH              | Twist1            | Tilt               | Roll                |
| Twist7          | Clash Strength           | Roll_roll         | Roll (DNA-protein) | Adenine content     |
| Direction       | Probability contacting   | Roll_shift        | Shift_slide        | Shift1              |
| Tilt4           | Tilt2                    | Free energy8      | Twist (DNA-        | Tilt_rise           |
| Free energy2    | Stacking energy2         | Stacking energy3  | Rise_rise          | Tilt_tilt           |
| Roll4           | Tilt_roll                | Minor Groove Size | GC content         | Inclination         |
| Slide stiffness | Melting Temperature1     | Twist3            | Tilt (DNA-protein) | Guanine content     |
| Twist6          | Major Groove Size        | Twist_rise        | Rise2              | Melting Temperature |
| Free energy     | Mobility to bend towards | Bend              |                    |                     |

**Physicochemical properties for TPCP**

|                        |                     |                 |                  |
|------------------------|---------------------|-----------------|------------------|
| Dnase I                | Bendability (DNase) | Bendability     | Trinucleotide GC |
| Nucleosome positioning | Consensus_roll      | Consensus-Rigid | Dnase I-Rigid    |
| MW-Daltons             | MW-kg               | Nucleosome      | Nucleosome-      |

**Additional File S2: Name of the features and their mapping.**

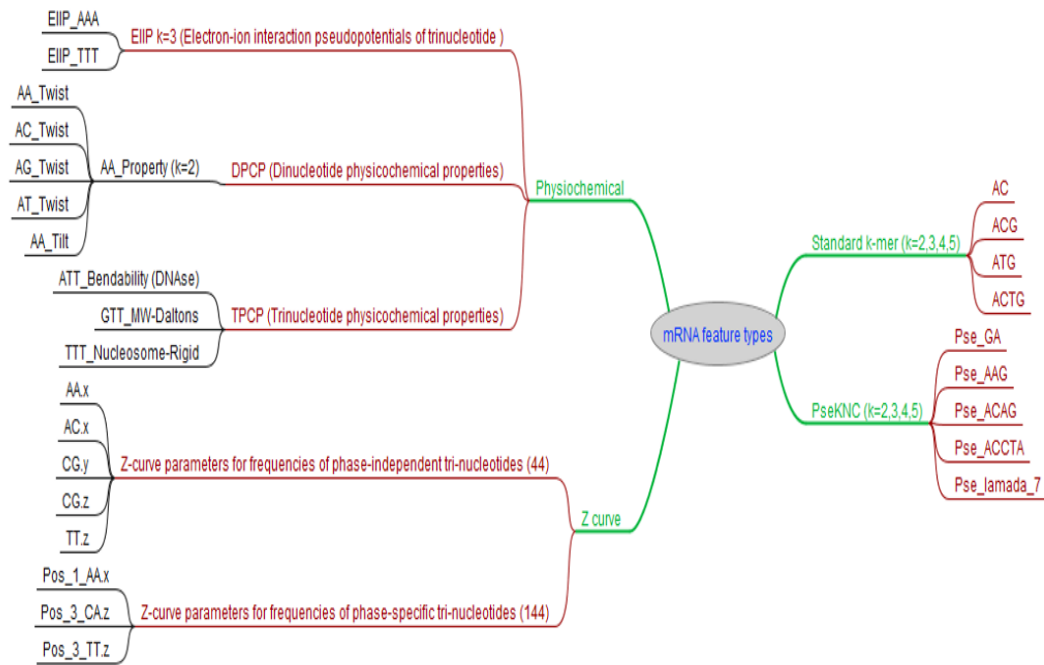

**Additional File S3: Selected top features and their importance based on SHAP analysis for locations**

| Cytoplasm               |                         |
|-------------------------|-------------------------|
| col_name                | feature_importance_vals |
| Pse_CCT                 | 206.673056              |
| Pse_AAAAA               | 116.444305              |
| Pos_2_AT.x              | 74.121072               |
| Pse_GTATG               | 48.02352                |
| Pse_GACG                | 46.29276                |
| Pse_CCGG                | 43.248298               |
| Pse_TTCA                | 42.917792               |
| GTG_Bendability (DNase) | 41.368288               |
| AACGA                   | 39.938774               |
| CGT_Consensus_roll      | 38.964102               |
| Pse_GGGGC               | 35.182722               |
| CATTT                   | 28.860437               |
| Pse_GAT                 | 27.656036               |
| AGGGT                   | 26.523641               |
| GCTCT                   | 24.929051               |
| Pse_TCTAC               | 23.68738                |
| Pse_CAGT                | 23.544006               |
| Pse_GT                  | 21.557911               |
| AGCCG                   | 18.609311               |
| TCTG                    | 18.351851               |

| Nucleus    |                         |
|------------|-------------------------|
| col_name   | feature_importance_vals |
| Pse_CCT    | 187.077578              |
| CATAG      | 103.88836               |
| AA.z       | 92.803388               |
| EIIP_GGG   | 87.853341               |
| CA.z       | 6.833876                |
| Pse_TCCC   | 50.697388               |
| Pse_GGCC   | 41.466302               |
| Pos_2_AG.z | 33.834258               |
| Pse_TCA    | 30.258604               |
| AGCAG      | 29.527333               |
| GACAG      | 29.239678               |
| CGAAT      | 26.264532               |
| Pse_CCCCT  | 25.990881               |
| CC.y       | 25.816443               |
| TATCA      | 21.579559               |
| Pos_3_GC.y | 20.970483               |
| TCCC       | 20.635664               |
| GTTA       | 19.271744               |
| Pse_AATAA  | 19.06901                |
| Pse_CCC    | 17.802511               |

| ER                  |                         |
|---------------------|-------------------------|
| col_name            | feature_importance_vals |
| GG.z                | 62.424883               |
| Pse_CGA             | 46.826436               |
| TAG_MW-kg           | 25.152063               |
| Pse_AGT             | 18.673658               |
| Pse_CGAAA           | 14.414912               |
| Pse_TCG             | 13.482978               |
| CAGA                | 11.115082               |
| Pse_AGTTT           | 10.804254               |
| AGC_Consensus-Rigid | 10.618663               |
| AA.y                | 10.461962               |
| Pse_AGTGT           | 9.715807                |
| Pse_CTGGG           | 9.417216                |
| AAT                 | 9.14116                 |
| TGTTA               | 7.662036                |
| GGGAG               | 7.484691                |
| TACAG               | 6.898512                |
| ACAAA               | 6.744645                |
| Pse_TGTGA           | 6.548677                |
| Pse_GTTA            | 6.360968                |
| AAGAT               | 5.77078                 |

| EXR                          |                         |
|------------------------------|-------------------------|
| col_name                     | feature_importance_vals |
| Pse_GTCT                     | 28.846373               |
| Pse_CCTAC                    | 24.563183               |
| TCCA                         | 17.138336               |
| GCACC                        | 13.030264               |
| Pse_TCCTA                    | 12.843472               |
| AGGGG                        | 10.559118               |
| Pse_GGCC                     | 8.395368                |
| Pse_GGG                      | 7.892994                |
| Pse_GACTT                    | 7.254099                |
| GT_Protein DNAtwist          | 5.718517                |
| Pse_CGAA                     | 5.530338                |
| TCGTC                        | 5.309657                |
| Pse_TATGC                    | 5.038264                |
| Pos_2_CA.x                   | 5.01998                 |
| Pse_GGGA                     | 4.821176                |
| CAT_Nucleosome               | 4.737092                |
| GGG_Trinucleotide GC Content | 4.697096                |
| Pse_CCGT                     | 4.304871                |
| CCTCT                        | 3.969292                |
| GTGA                         | 3.670255                |

| Mitochondria                |                         |  |
|-----------------------------|-------------------------|--|
| col_name                    | feature_importance_vals |  |
| CA.z                        | 29.34091                |  |
| Pos_1_TA.x                  | 14.02338                |  |
| Pos_2_AC.x                  | 12.214785               |  |
| Pos_3_AT.x                  | 7.009193                |  |
| Pos_2_CC.x                  | 5.582243                |  |
| CTA_Bendability (consensus) | 3.881014                |  |
| AGGGG                       | 3.022339                |  |
| CA.y                        | 2.27599                 |  |
| CCAAT                       | 1.780037                |  |
| ATCGT                       | 1.251607                |  |
| Pse_TCAAA                   | 1.048577                |  |
| GCTTG                       | 1.016545                |  |
| Pos_3_GG.x                  | 0.564205                |  |
| GG_Minor Groove Distance    | 0                       |  |
| TT_Minor Groove Distance    | 0                       |  |
| TG_Minor Groove Distance    | 0                       |  |
| CT_Flexibility_slide        | 0                       |  |
| CG_Flexibility_slide        | 0                       |  |
| CC_Flexibility_slide        | 0                       |  |
| CA_Flexibility_slide        | 0                       |  |

| Pseudopodium    |                         |  |
|-----------------|-------------------------|--|
| col_name        | feature_importance_vals |  |
| PseKNC_Iamada_6 | 13.805925               |  |
| PseKNC_CAGAG    | 6.363826                |  |
| GCGCA           | 5.822396                |  |
| Pos_2_AAy       | 3.624833                |  |
| PseKNC_GGTAT    | 3.404801                |  |
| PseKNC_CGTGG    | 3.32124                 |  |
| PseKNC_AAAAA    | 3.260308                |  |
| TAAC            | 2.892381                |  |
| Pos_3_CCz       | 2.695837                |  |
| PseKNC_AGAAC    | 2.267244                |  |
| CGTA            | 2.091755                |  |
| PseKNC_TTCCT    | 2.000825                |  |
| PseKNC_TCAG     | 1.996316                |  |
| CCACG           | 1.164365                |  |
| GATA            | 1.142898                |  |
| ATTAG           | 1.062658                |  |
| AATCA           | 1.05816                 |  |
| GGCGT           | 0.970909                |  |
| PseKNC_TTGAC    | 0.851616                |  |
| Pos_2_CGy       | 0.744699                |  |

| Exosome          |                         |  |
|------------------|-------------------------|--|
| col_name         | feature_importance_vals |  |
| GCGA             | 22.479522               |  |
| CTx              | 21.370833               |  |
| PseKNC_CTGAC     | 15.862419               |  |
| PseKNC_ACTGT     | 15.024765               |  |
| PseKNC_ACACA     | 10.369668               |  |
| GTy              | 9.329866                |  |
| CGAGC            | 9.075361                |  |
| PseKNC_GGCAA     | 7.670002                |  |
| GACAC            | 6.441558                |  |
| PseKNC_CATGC     | 5.773664                |  |
| PseKNC_TATGC     | 5.754335                |  |
| GTC_DnaseI Rigid | 5.700318                |  |
| PseKNC_TCCT      | 5.456513                |  |
| CCGGA            | 5.241851                |  |
| PseKNC_TATCA     | 5.085149                |  |
| PseKNC_TACGT     | 5.008218                |  |
| Pos_3_TGz        | 4.584346                |  |
| CTCT             | 4.530319                |  |
| GCC_DnaseI       | 4.192017                |  |
| PseKNC_CCTTT     | 3.86548                 |  |

| Ribosome                   |                         |  |
|----------------------------|-------------------------|--|
| col_name                   | feature_importance_vals |  |
| CGz                        | 73.71227                |  |
| AAAAA                      | 43.770771               |  |
| AC_MinorGrooveDistance     | 35.896707               |  |
| GG_Rise2                   | 22.665376               |  |
| PseKNC_ACGAC               | 18.77651                |  |
| AC_Freeenergy8             | 15.881936               |  |
| GGGC                       | 14.824248               |  |
| TGTG                       | 14.383809               |  |
| PseKNC_ATAG                | 12.964419               |  |
| Pos_2_TTz                  | 12.424472               |  |
| AC_Twist_roll              | 12.124697               |  |
| GACTA                      | 9.875691                |  |
| PseKNC_GGGAG               | 9.349708                |  |
| CA_Shift1                  | 9.248852                |  |
| TTGC                       | 8.904275                |  |
| GG_StabilisingenergyofZDNA | 8.615998                |  |
| PseKNC_GTAC                | 8.251039                |  |
| PseKNC_GCGCC               | 7.655031                |  |
| TCACT                      | 7.579636                |  |
| PseKNC_AAAAA               | 7.407486                |  |

| Cytosol                   |                         |  |
|---------------------------|-------------------------|--|
| col_name                  | feature_importance_vals |  |
| PseKNC_AAAAA              | 85.929442               |  |
| TG_Roll                   | 42.531932               |  |
| CCTCC                     | 29.843055               |  |
| TGGT                      | 27.115962               |  |
| GT_Roll1                  | 19.03369                |  |
| PseKNC_CGAA               | 18.454454               |  |
| CGAA                      | 15.675292               |  |
| TCy                       | 13.237076               |  |
| PseKNC_GCCCC              | 13.16231                |  |
| PseKNC_TTTCT              | 12.597915               |  |
| GGTGT                     | 11.697577               |  |
| AGCTA                     | 11.124263               |  |
| TCT_Nucleosomepositioning | 10.832596               |  |
| PseKNC_CCTCT              | 10.282507               |  |
| GACGA                     | 9.901289                |  |
| GGAAT                     | 9.487927                |  |
| TCCC                      | 9.417518                |  |
| PseKNC_GCATA              | 8.450371                |  |
| ATx                       | 8.099528                |  |
| GGCTG                     | 8.022591                |  |

| Posterior                 |                         |  |
|---------------------------|-------------------------|--|
| col_name                  | feature_importance_vals |  |
| CGA_Nucleosomepositioning | 25.866967               |  |
| PseKNC_CCGGG              | 4.499514                |  |
| PseKNC_CTTTT              | 1.629831                |  |
| Pos_1_ATz                 | 1.279826                |  |
| CTCGT                     | 1.208085                |  |
| AC_MinorGrooveSize        | 0.961555                |  |
